# Supplementary material
Source: PubMed Central journal article supplement (PMC3561812)
Supplement: JCI64265sd.pdf [file JCI64265sd.pdf]

# Supplemental Figure S1

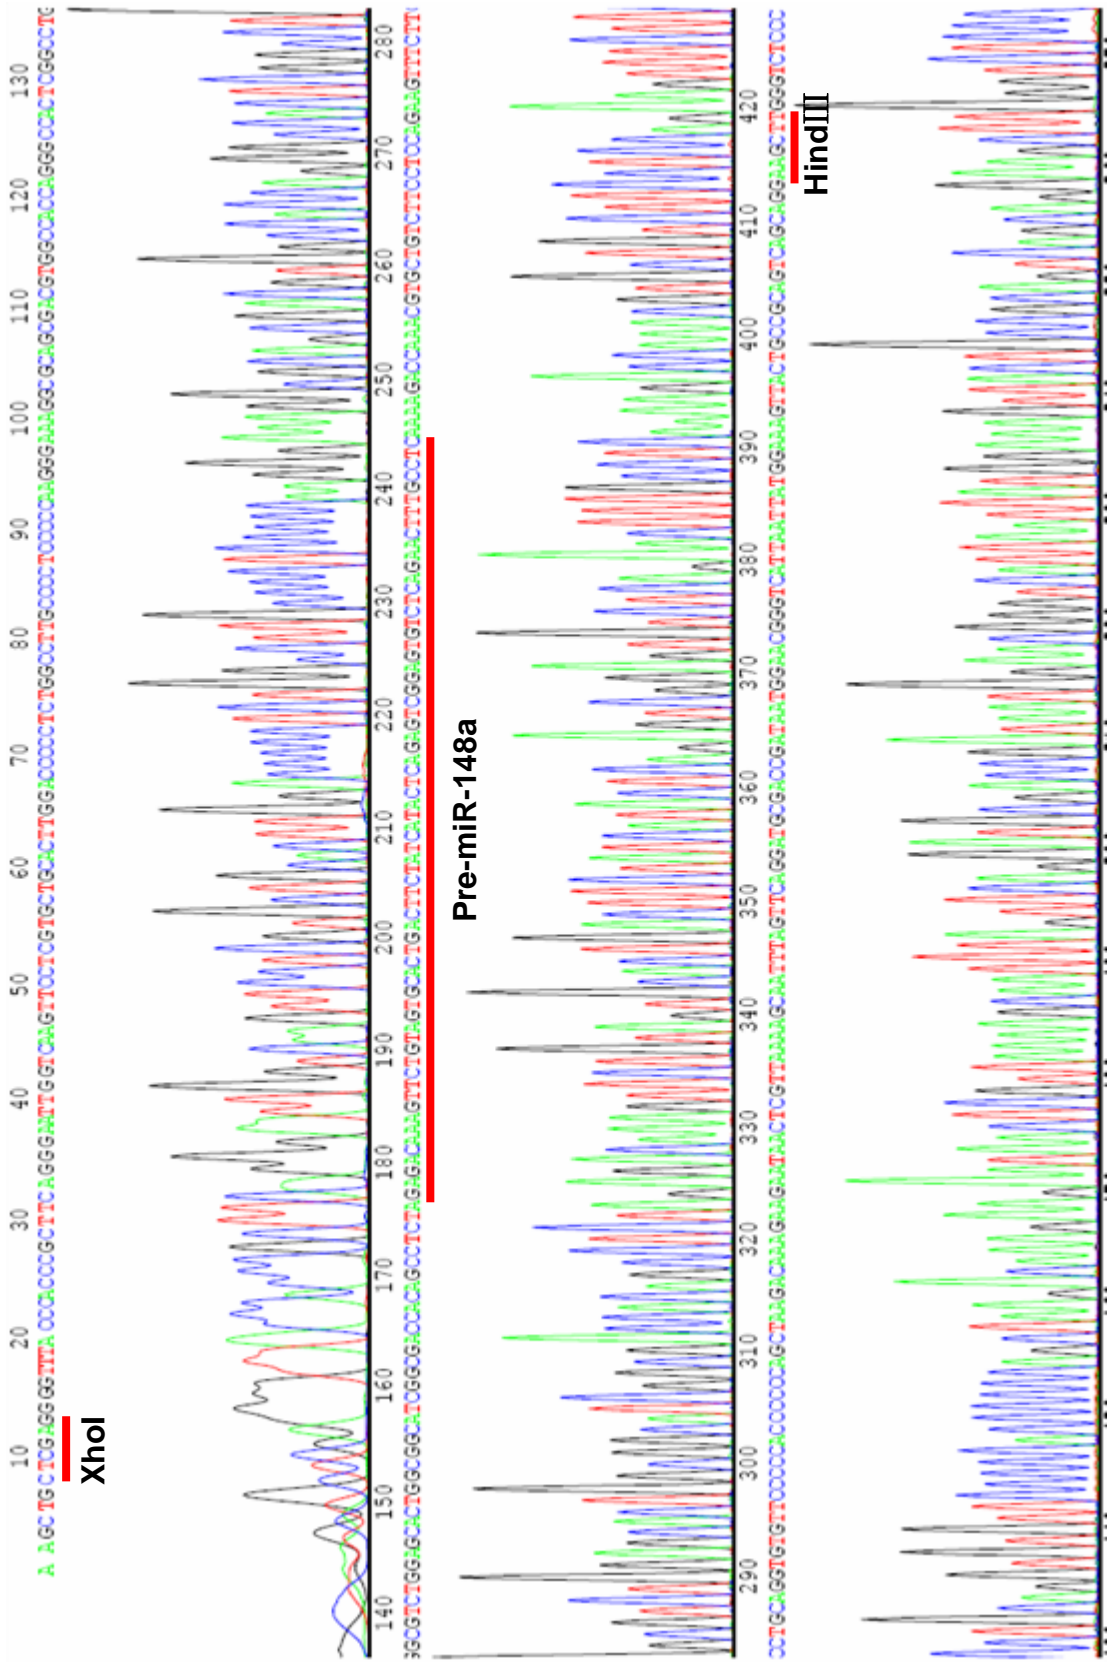

Supplemental Figure 1. DNA sequencing of miR-148a cloned into pcDNA3.0 vector. The pre-miR-148a sequence is underlined. The cloning sites are XhoI and HindIII as indicated.

## Supplemental Figure S2

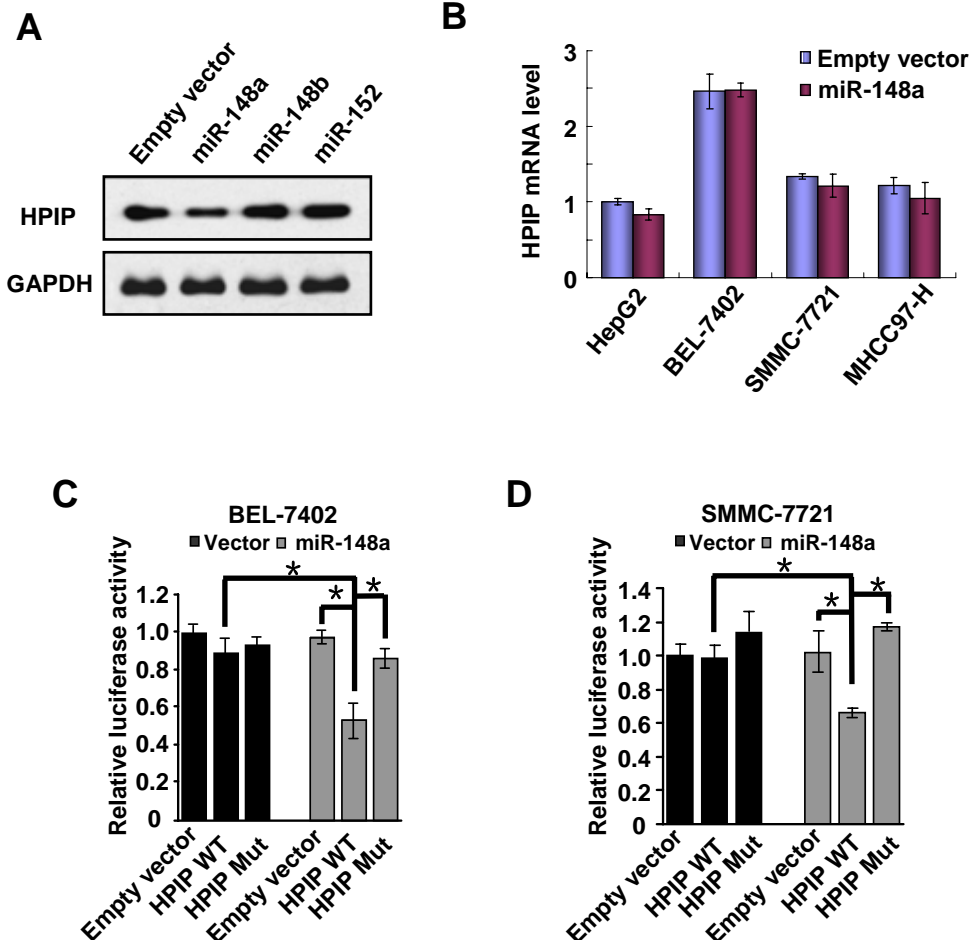

**Supplemental Figure 2. MiR-148a inhibits HPIP expression at the protein level.** (A) Immunoblot analysis of HepG2 cells transfected with miR-148a, miR-148b or miR-152. (B) HepG2, BEL-7402, SMMC-7721 and MHCC97-H cells transfected with miR-148a or empty vector were used for real-time RT-PCR with HPIP primers. (C and D) MiRNA luciferase reporter assays in BEL-7402 (C) and SMMC-7721 (D) cells transfected with miR-148a and wild-type or mutated HPIP reporter. All values shown are mean  $\pm$  SD of triplicate measurements and have been repeated 3 times with similar results (\* $p < 0.01$ ).

## Supplemental Figure S3

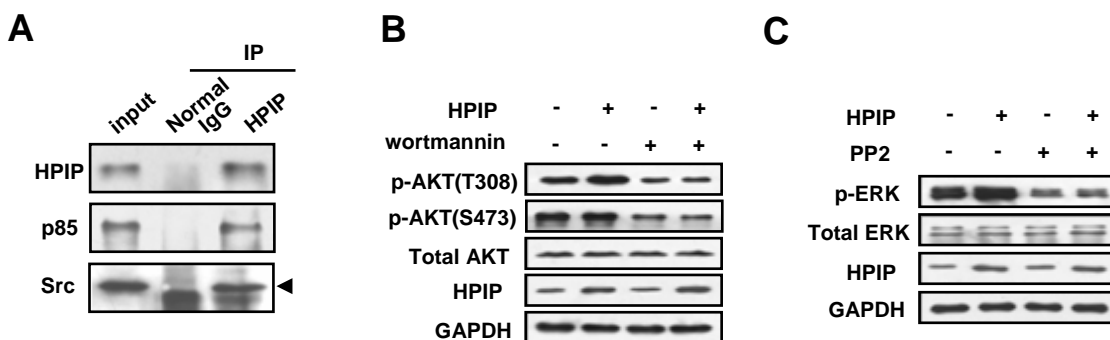

**Supplemental Figure 3. HPIP activates AKT and ERK through its interaction with Src kinase and the p85 subunit of PI3K.** (A) Cell lysates from HepG2 cells were immunoprecipitated with anti-HPIP or normal IgG, followed by immunoblot with the indicated antibodies. (B and C) Effect of either PI3K inhibitor wortmannin (B) or Src kinase inhibitor PP2 (C) on HPIP-mediated activation of AKT and ERK. HepG2 cells transfected with HPIP were treated with 20  $\mu$ M wortmannin or 50  $\mu$ M PP2 for 24 h.

## Supplemental Figure S4

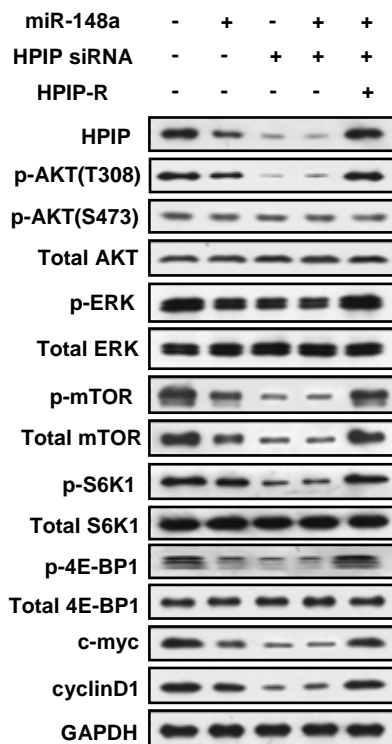

**Supplemental Figure 4. HPIP regulates mTOR signaling and miR-148a modulation of mTOR signaling depends on HPIP.** Western blot analysis of HepG2 cells transfected with miR-148a, HPIP siRNA, miR-148a plus HPIP siRNA, or miR-148a together with HPIP siRNA1 and siRNA-resistant HPIP (HPIP-R).

# Supplemental Figure S5

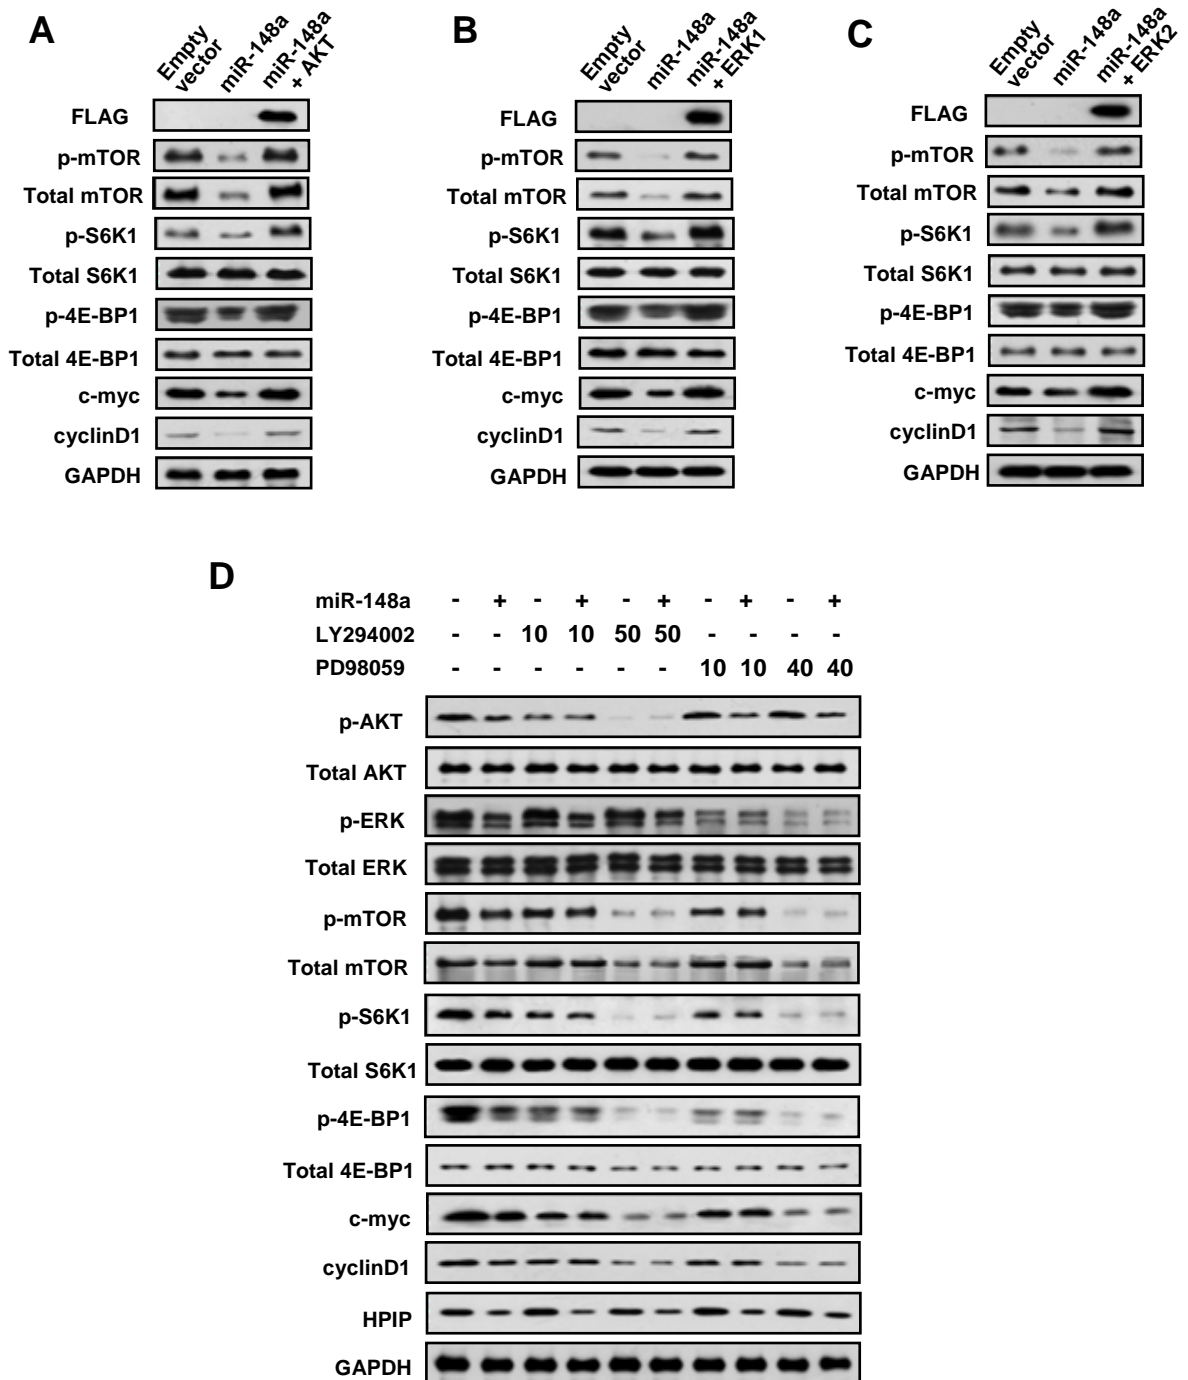

**Supplemental Figure 5. MiR-148a regulates mTOR signaling through inhibition of AKT and ERK1/2.** (A-C) Western blot analysis of HepG2 cells transfected with miR-148a or miR-148a plus AKT, ERK1 or ERK2. (D) Western blot analysis of HepG2 cells transfected with miR-148a and treated with LY294002 (10  $\mu$ M or 50  $\mu$ M) or PD98059 (10  $\mu$ M and 40  $\mu$ M) for 24 h.

# Supplemental Figure S6

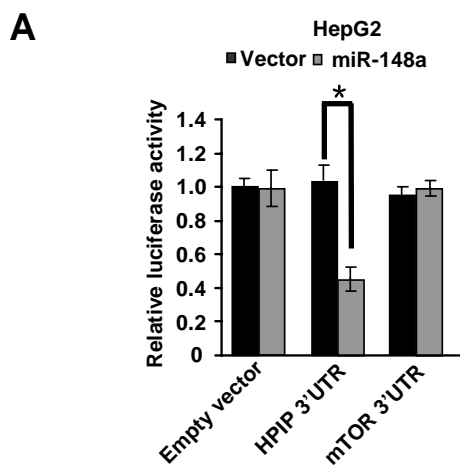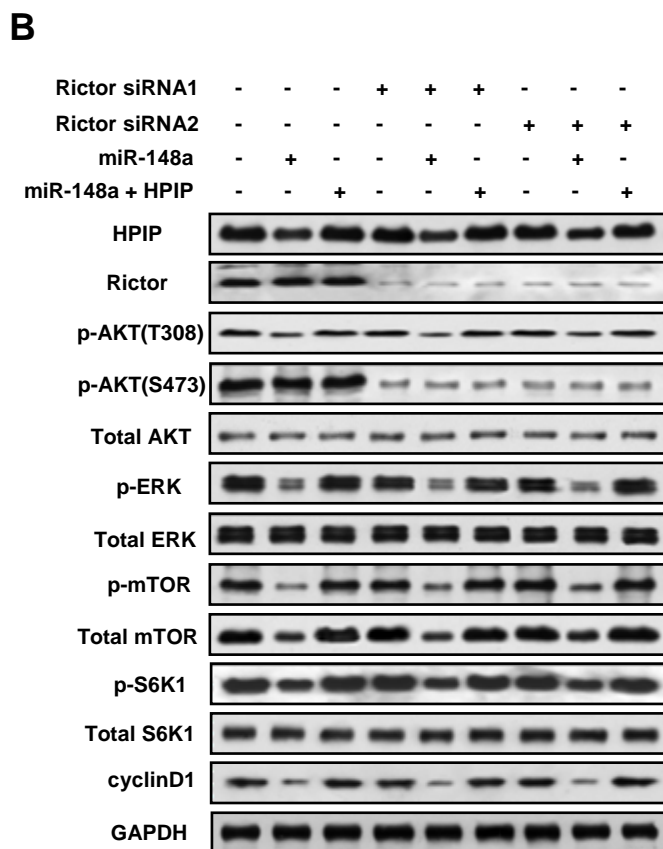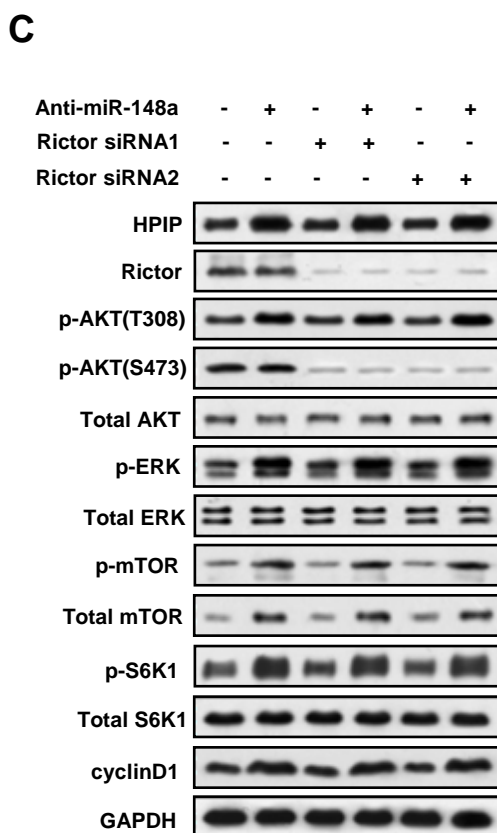

## Supplemental Figure 6. Activation of mTORC2 is not required for miR-148a modulation of mTOR signaling.

(A) MiRNA luciferase reporter assays in HepG2 cells transfected with miR-148a and HPIP 3'UTR reporter or mTOR 3'UTR reporter. All values shown are mean  $\pm$  SD of triplicate measurements and have been repeated 3 times with similar results (\* $p < 0.01$ ). (B) Western blot analysis of HepG2 cells transfected with miR-148a or miR-148a plus HPIP with or without Rictor siRNAs. (C) Western blot analysis of HepG2 cells transfected with anti-miR-148a or anti-miR-148a plus Rictor siRNAs.

## Supplemental Figure S7

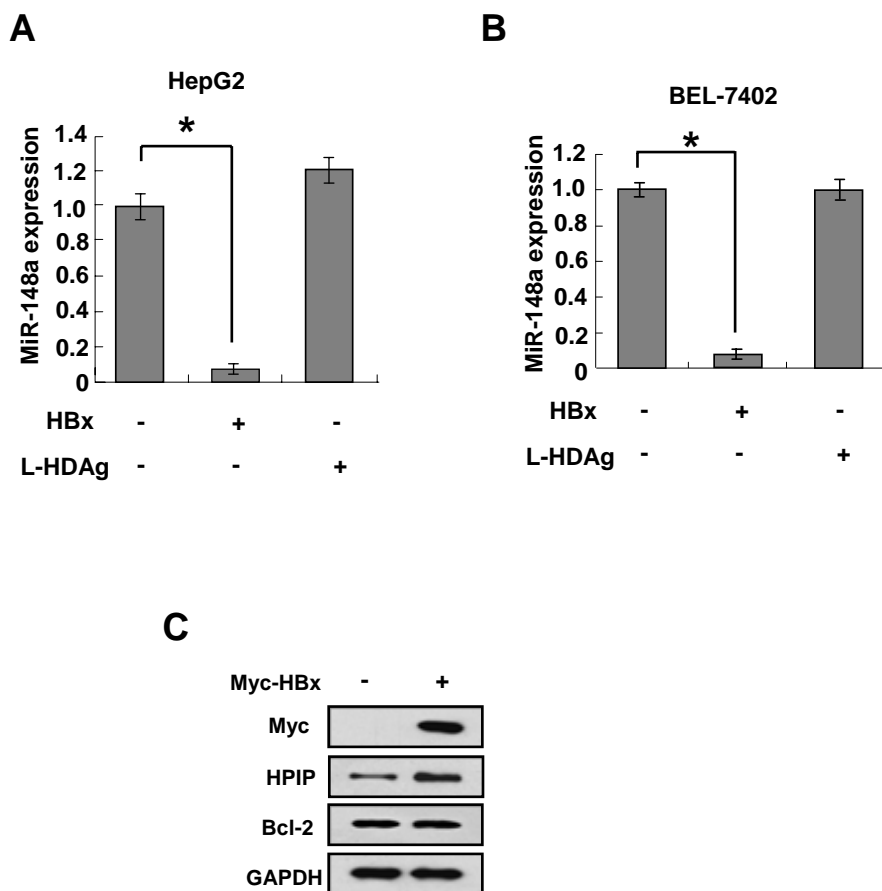

**Supplemental Figure 7. HBx reduces miR-148a expression.** (A and B) HepG2 (A) and BEL-7402 (B) cells transfected with HBx or L-HDAg were used for real-time RT-PCR with miR-148a primers ( $*p < 0.01$ ). (C) Immunoblot analysis of HepG2 cells transfected with Myc-tagged HBx or empty vector.

## Supplemental Figure S8

**A**

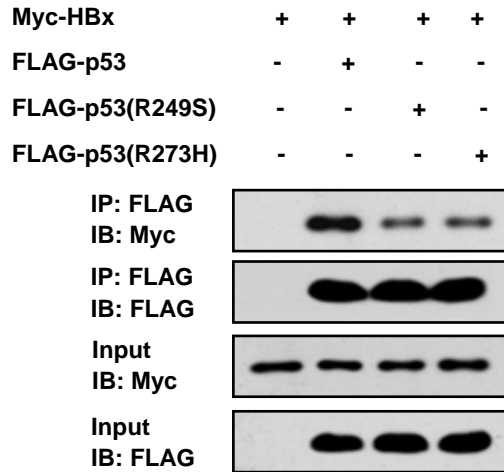

**B**

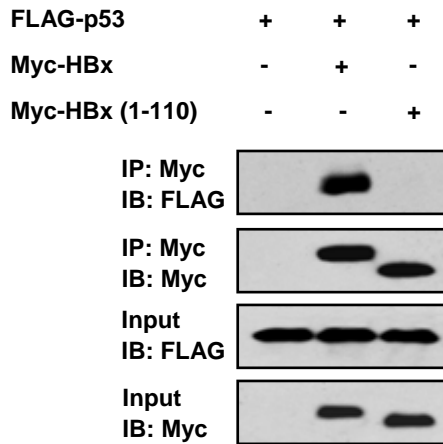

**Supplemental Figure 8. Mutation of p53 and deletion of HBx C-terminus alter the interaction between p53 and HBx.** (A) Myc-tagged HBx and FLAG-tagged p53, p53(R249S) or p53(R273H) were co-transfected into 293T cells. Cell lysates were immunoprecipitated by anti-FLAG antibody, and precipitates were immunoblotted with anti-Myc antibody. (B) FLAG-tagged p53 and Myc-tagged HBx or HBx(1-110) were co-transfected into 293T cells. Cell lysates were immunoprecipitated with anti-Myc, and precipitates were immunoblotted with anti-FLAG.



# Supplemental Figure S9

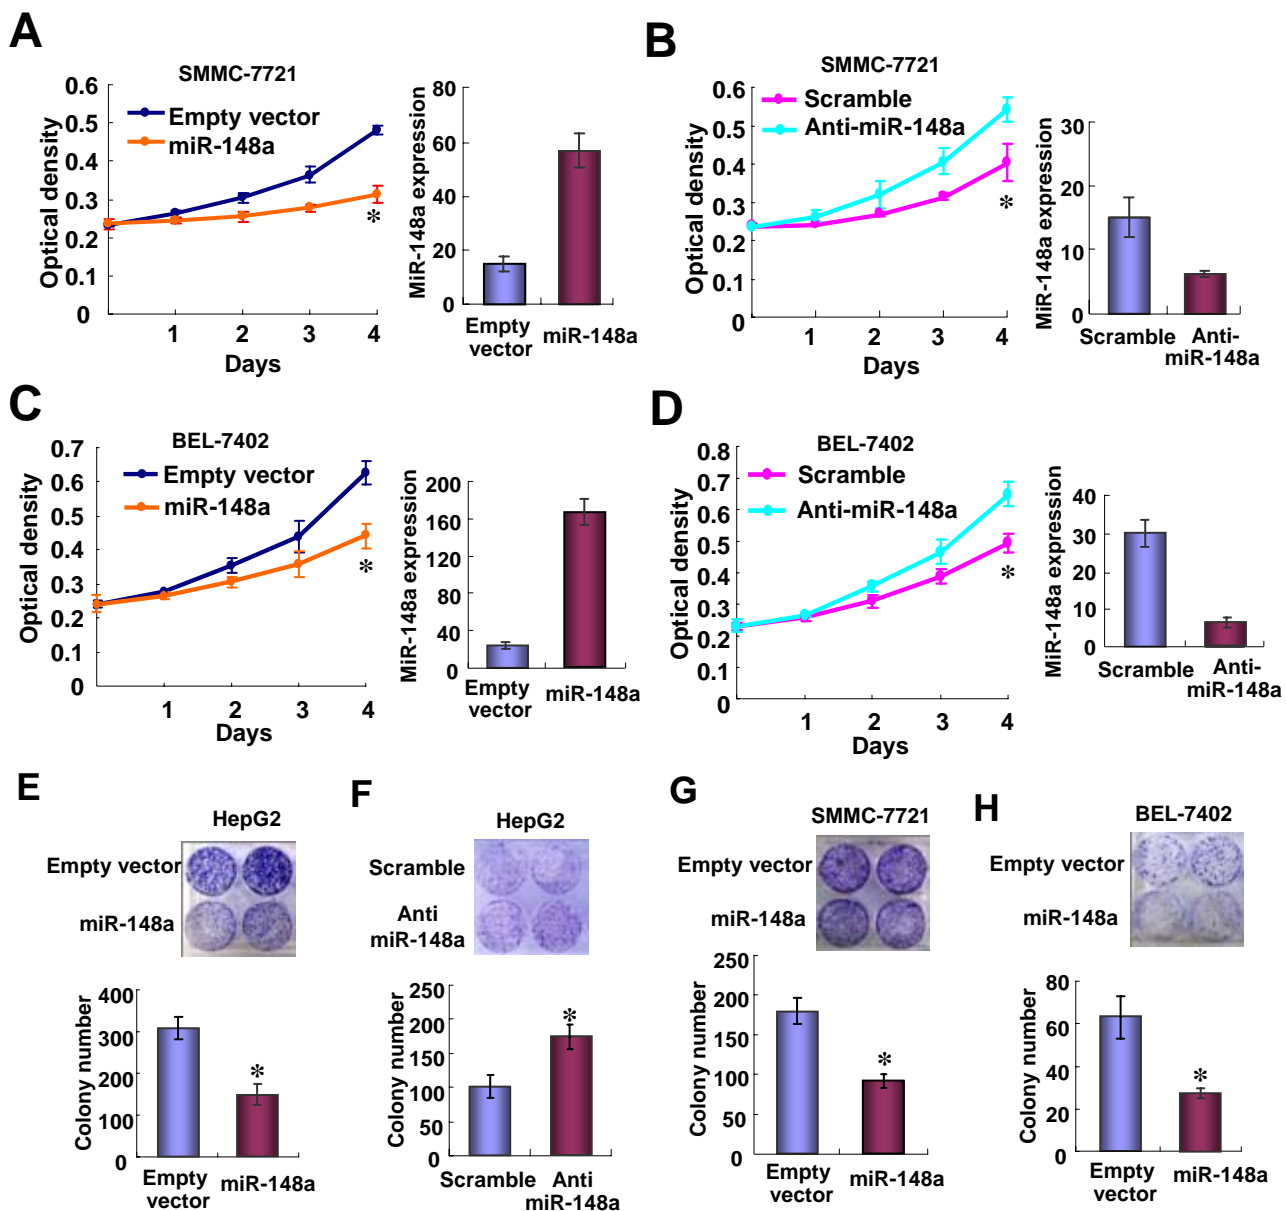

**Supplemental Figure 9. MiR148a reduces HCC cell growth.** (A-D) SMMC-7721 (A and B) and BEL-7402 (C and D) cells expressing miR-148a (A and C) or anti-miR-148a (B and D) were grown in regular medium. At specified times, cell numbers were determined by CCK-8 assay. Representative real-time RT-PCR shows miR-148a expression (a-d, right panel). (E-H) Colony formation assays for HepG2 cells expressing miR-148a (E) or anti-miR-148a (F), and SMMC-7721 (G) and BEL-7402 (H) cells expressing miR-148a. All values shown are mean  $\pm$  SD of triplicate measurements and have been repeated 3 times with similar results (\*  $p < 0.01$  versus empty vector or scramble vector).

# Supplemental Figure S10

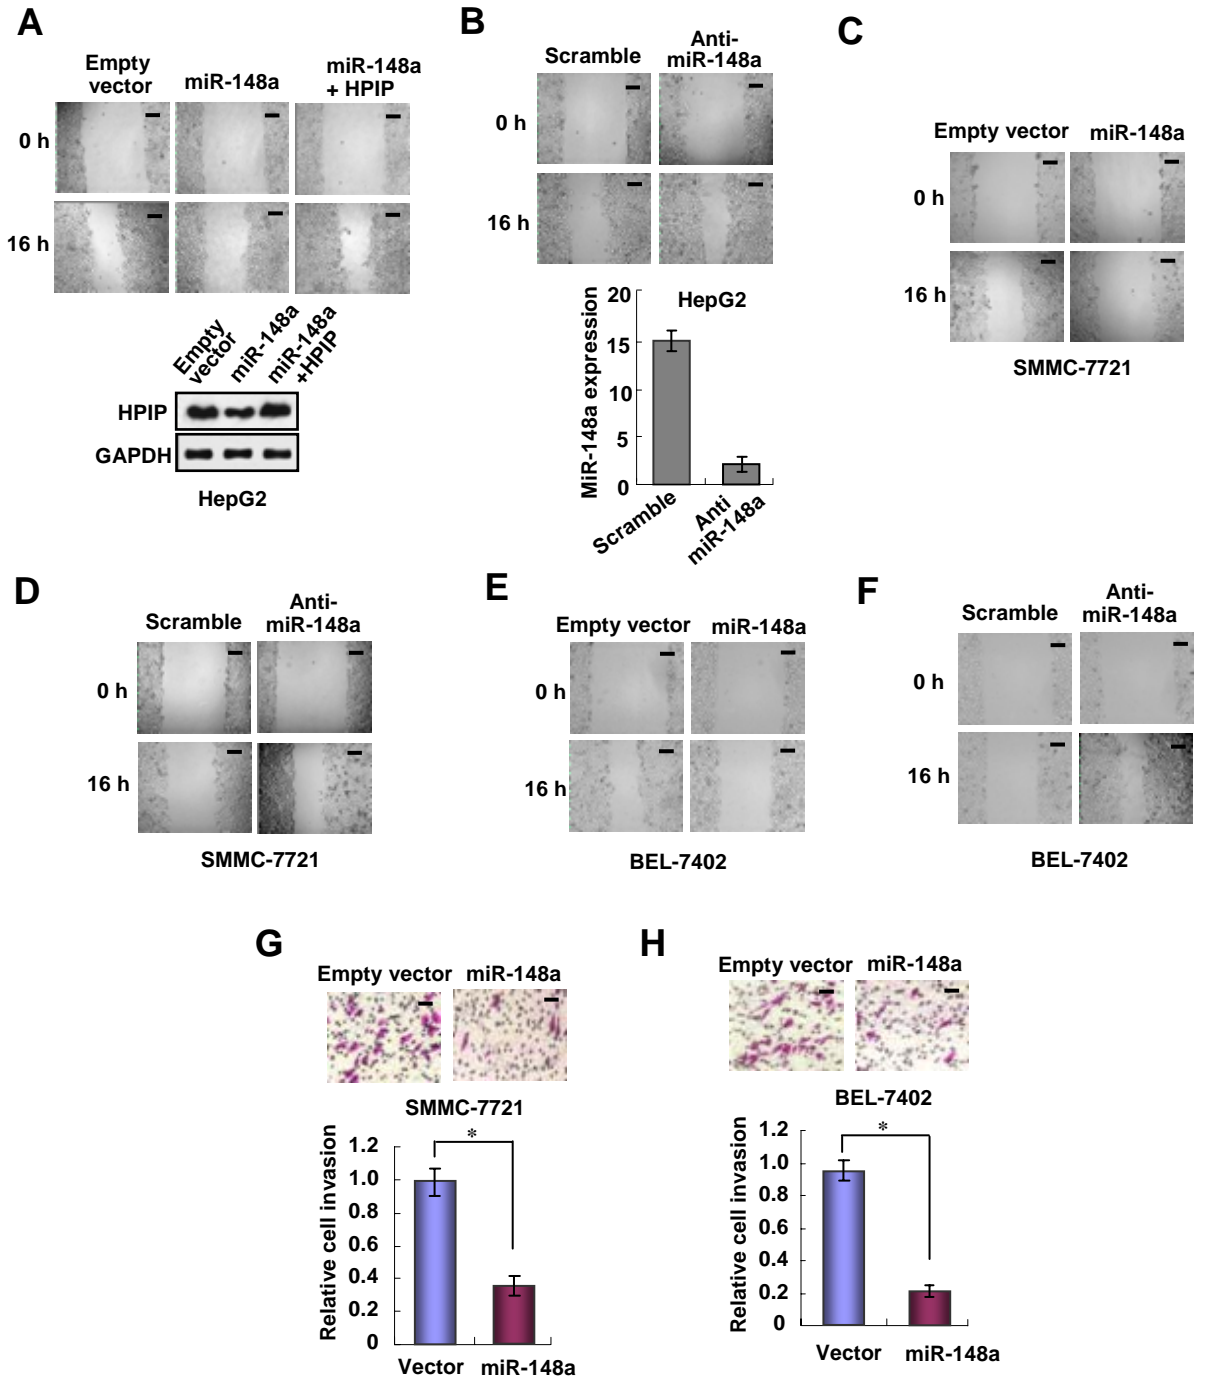

**Supplemental Figure 10. MiR-148a suppresses HCC cell migration and invasion.** (A and B) Wound-healing assays were conducted in HepG2 cells expressing miR-148a or miR-148a plus HPIP (A) or anti-miR-148a (B). Cell migration was measured 16 h after cells were scratched. Expression of HPIP and miR-148a were analyzed by Western blot (A) and real-time RT-PCR (B), respectively. Scale bar, 100  $\mu$  M. (C-F) Wound-healing assays were conducted in SMMC-7721 (C and D) and BEL-7402 (E and F) cells expressing miR-148a (C and E) or anti-miR-148a (D and F). (G and H) Cell invasion was evaluated in SMMC-7721 (G) and BEL-7402 (H) cells expressing miR-148a using a Matrigel invasion chamber. Invasive cells were fixed and stained with crystal violet (upper panels). Scale bar, 100  $\mu$  M. All values shown are mean  $\pm$  SD of triplicate measurements and have been repeated 3 times with similar results ( $*p < 0.01$ ).

# Supplemental Figure S11

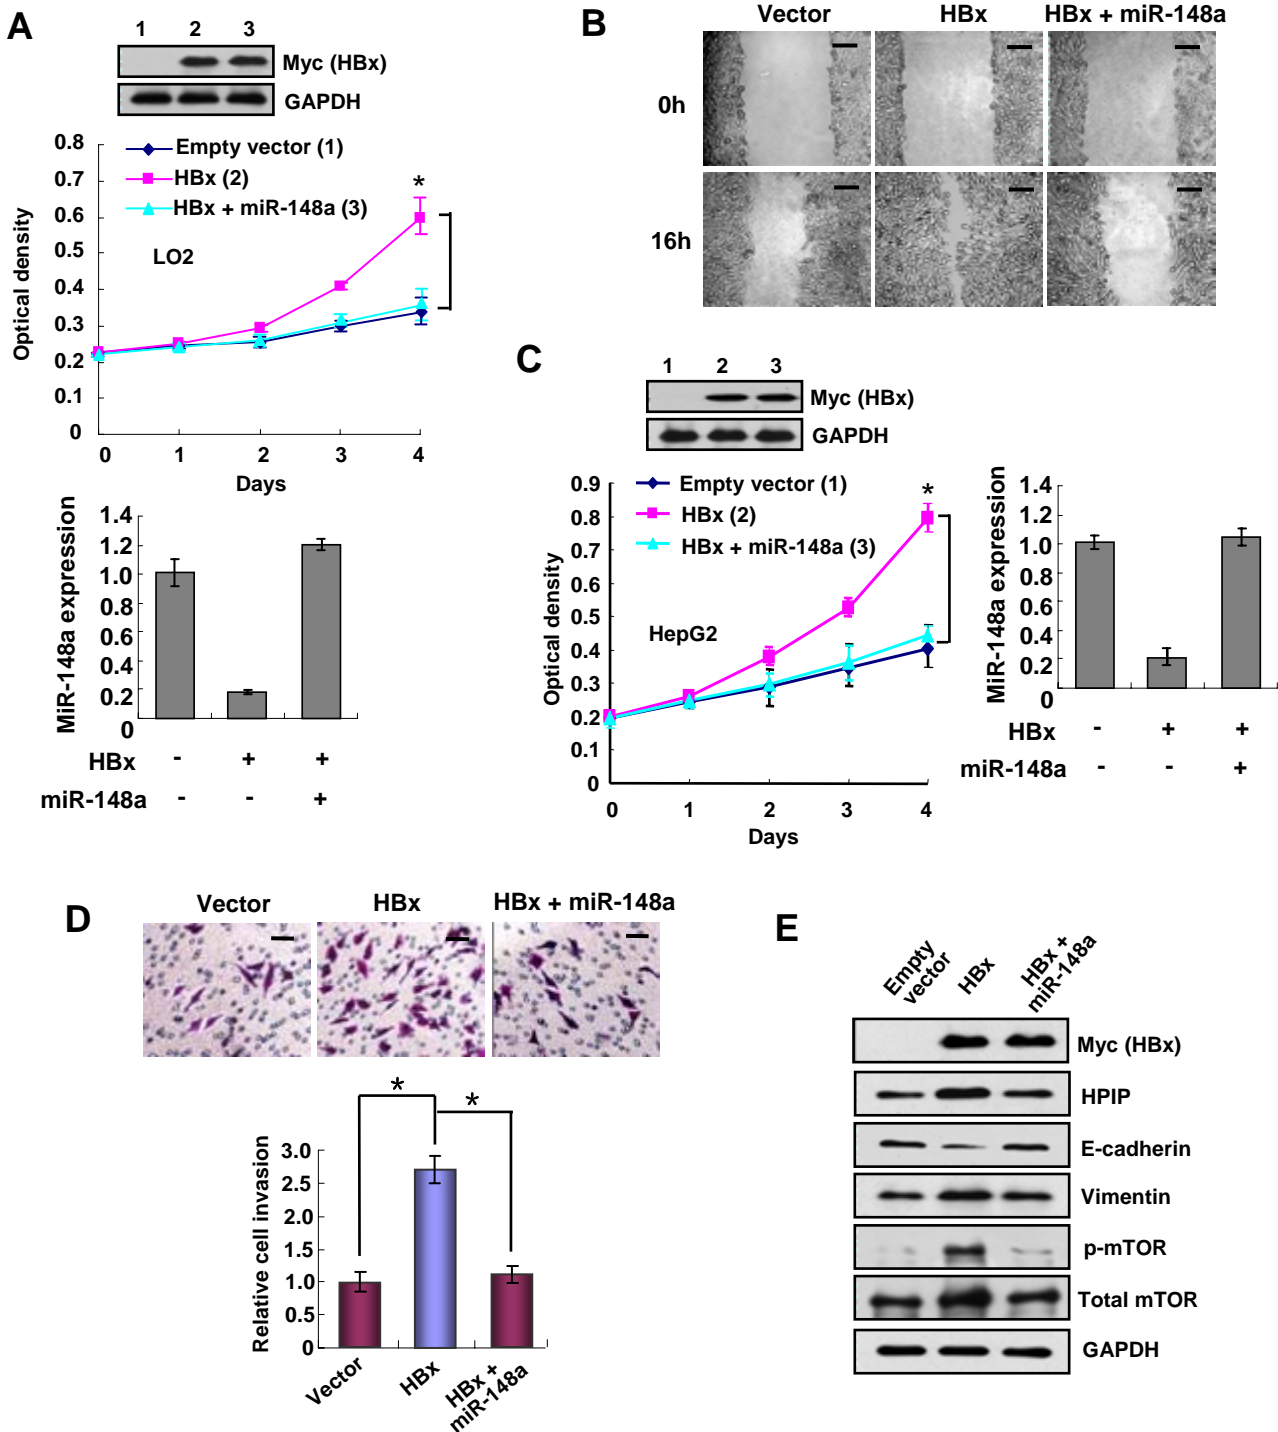

**Supplemental Figure 11. HBx enhances liver cell growth and migration through inhibition of miR-148a.** (A) LO2 cells transfected with Myc-tagged HBx or Myc-tagged HBx plus miR-148a were grown in regular medium. At specified times, cell numbers were determined by CCK-8 assay. The representative immunoblot with anti-Myc shows Myc-HBx expression. Representative real-time PCR shows miR-148a expression (lower panel) ( $*p < 0.01$ ). (B) Wound-healing assays were performed in LO2 cells transfected with HBx or HBx plus miR-148a. Cell migration was measured 16 h after cells were scratched. Scale bar, 100  $\mu$  m. (C) HepG2 cells were transfected and analyzed as in (A). (D) Cell migration was evaluated in HepG2 cells transfected as in (C) using a migration chamber. Scale bar, 100  $\mu$  M. All values shown are mean  $\pm$  SD of triplicate measurements ( $*p < 0.01$ ). (E) Western blot analysis of LO2 cells transfected with Myc-tagged HBx or Myc-tagged HBx plus miR-148a.

# Supplemental Figure S12

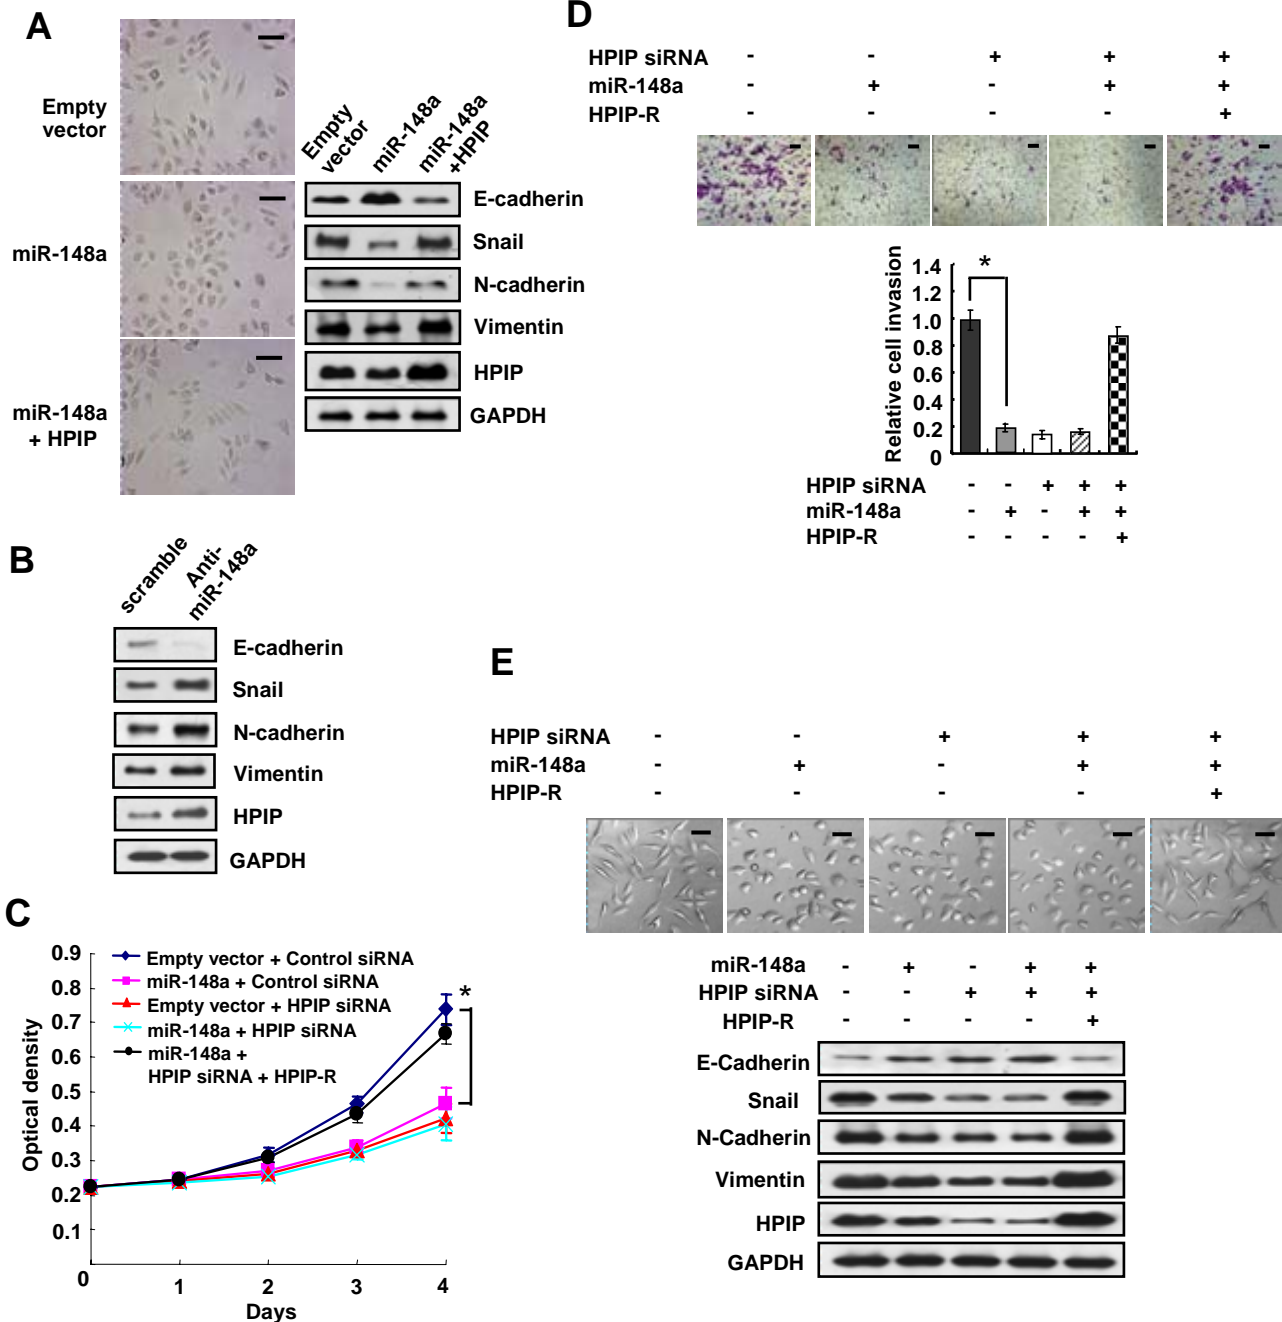

**Supplemental Figure 12. MiR-148a represses cell proliferation, invasion and EMT through inhibition of HPIP expression.** (A and B) Immunoblot analysis of HepG2 cells transfected with miR-148a or miR-148a plus HPIP (A) or anti-miR-148a (B). Morphologic changes are shown in the photographs (A, left panel). Scale bar, 100  $\mu$ m. (C) HepG2 cells expressing miR-148a, HPIP siRNA1, miR-148a plus HPIP siRNA1, or miR-148a together with HPIP siRNA1 and siRNA-resistant HPIP (HPIP-R) were cultured in regular medium. At specified times, cell numbers were determined by CCK-8 assay. (D) Cell invasion was evaluated in HepG2 cells expressing miR-148a, HPIP siRNA1, miR-148a plus HPIP siRNA1, or miR-148a together with HPIP siRNA1 and HPIP-R using a Matrigel invasion chamber. (E) HepG2 cells were transfected with miR-148a, HPIP siRNA1, miR-148a plus HPIP siRNA1, or miR-148a together with HPIP siRNA1 and HPIP-R, and were analyzed as in (A). All values shown are mean  $\pm$  SD of triplicate measurements and have been repeated 3 times with similar results (\* $p < 0.01$ )

# Supplemental Figure S13

**A**

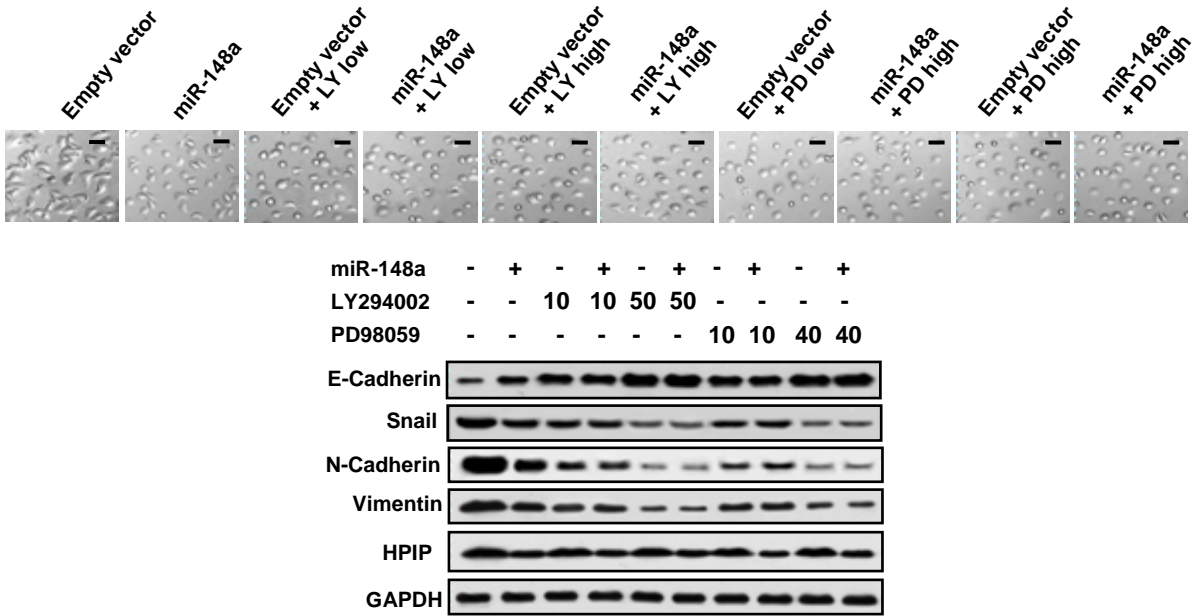

**B**

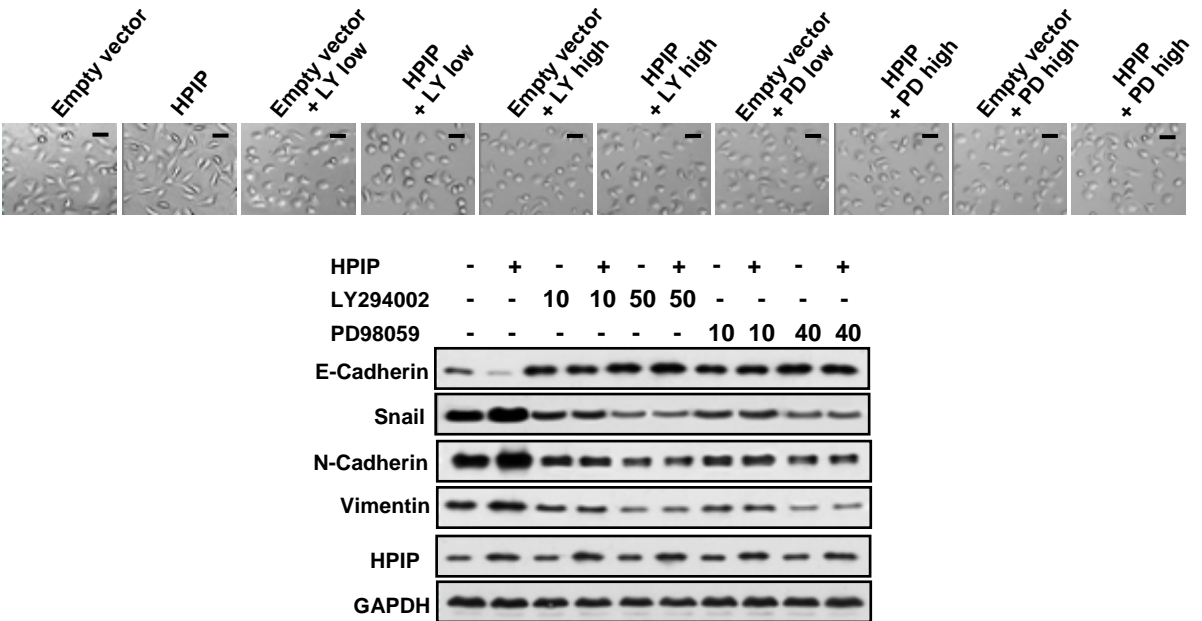

**Supplemental Figure 13. MiR-148a/HPIP regulates EMT through modulation of AKT and ERK1/2.** HepG2 cells were transfected with miR-148a (A) or HPIP (B) and treated for 24 h with 10  $\mu$ M LY294002 (LY low), 50  $\mu$ M LY294002 (LY high), 10  $\mu$ M PD98059 (PD low), or 40  $\mu$ M PD98059 (PD high). Western blot was performed with the indicated antibodies. Morphologic changes are shown in the photographs (upper panel). Scale bar, 100  $\mu$ m.

# Supplemental Figure S14

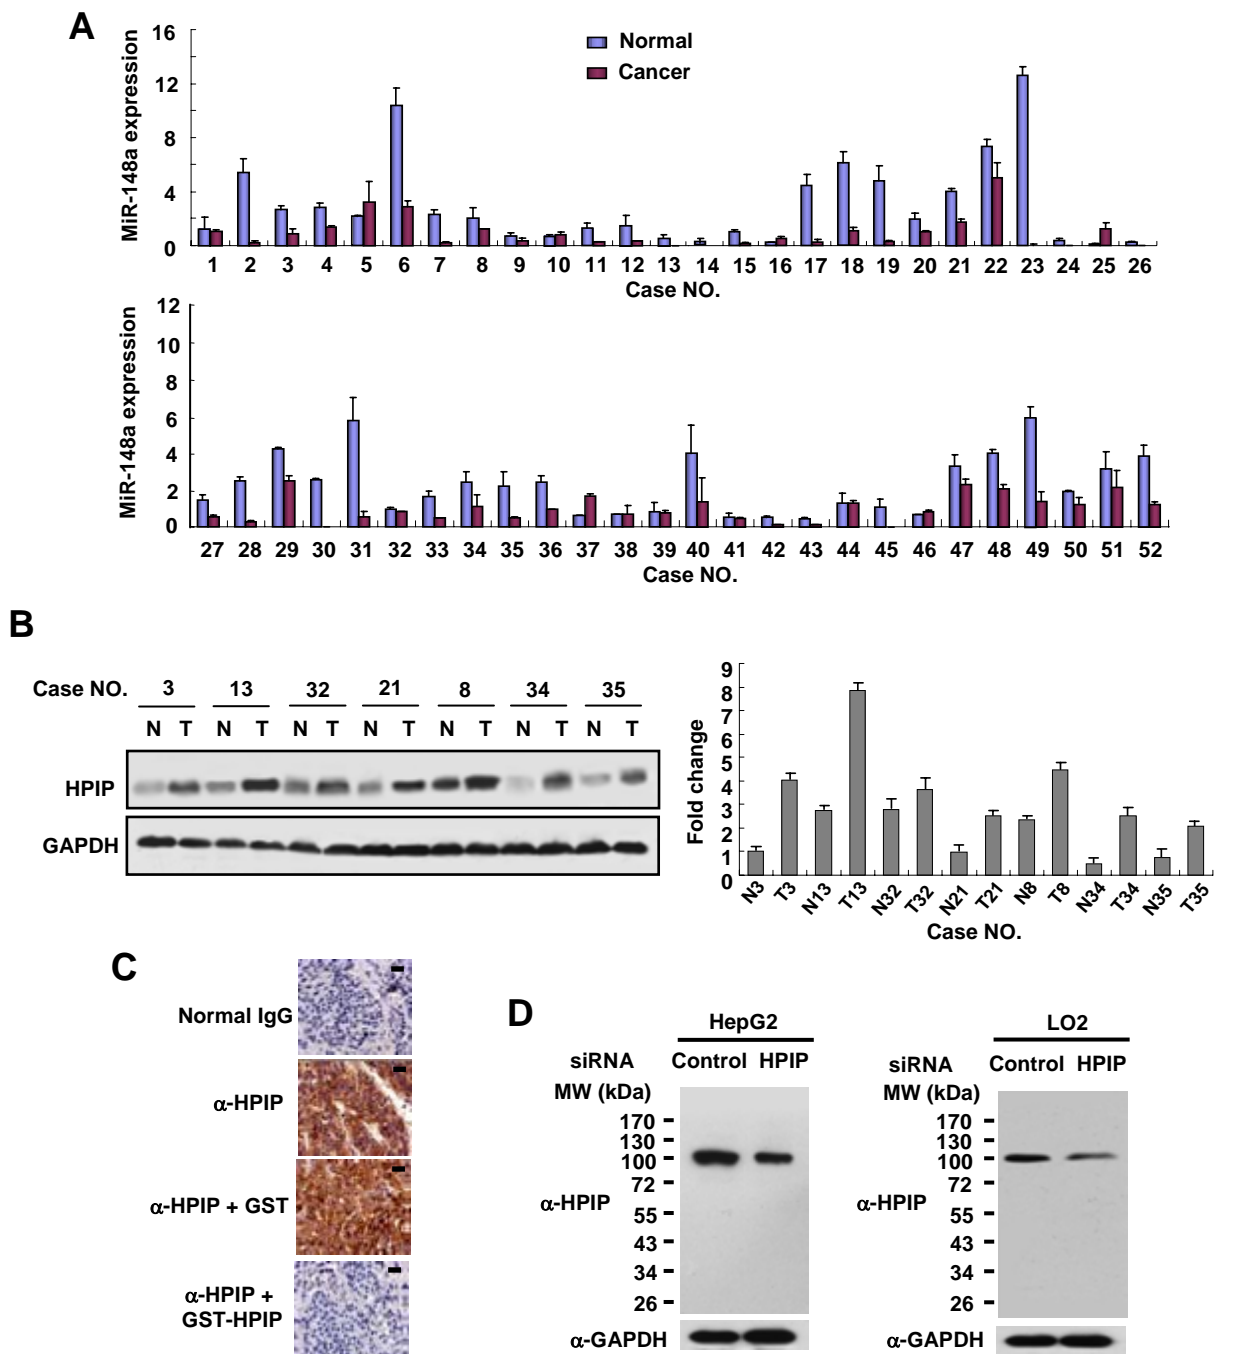

**Supplemental Figure 14. MiR-148a and HPIP expression in HCC patients.** (A) Real-time RT-PCR analysis of miR-148a expression in 52 pairs of human cancerous liver tissues and adjacent normal liver tissues. (B) Representative immunoblots of HPIP in 7 pairs of human liver tumors (T) and adjacent normal liver tissues (N). The densitometric quantitation of HPIP bands normalized to GAPDH from 3 independent experiments is shown (right panel) (mean  $\pm$  SD). (C) Immunohistochemical staining of liver cancer specimens incubated with normal IgG or anti-HPIP. To validate antibody specificity, the anti-HPIP was pre-incubated with recombinant GST-HPIP protein or GST for 1 h prior to applying to tissue. Original magnification,  $\times 20$ . Scale bar, 100  $\mu$  m. (D) Immunoblot analysis of lysates from HepG2 (left panel) or LO2 (right panel) cells transfected with control siRNA or HPIP siRNA using antibodies specific for anti-HPIP. MW, molecular weight.
